# Supplementary material
Source: PubMed Central journal article supplement (PMC2940497)

2

3 **Supplemental Figure Legend**

4 **Figure 1.** Relative levels of mRNAs for TNF-alpha and IL-1beta in  
5 microdissected NTS samples as measured by quantitative real time PCR. OXY-  
6 SAP and CON-SAP injections increased TNF-alpha and IL-1beta mRNA levels  
7 compared to PBS injections and Noninjected NTS. (N=4-9/group). Data  
8 expressed as mean  $\pm$  S.E.M.

9

10 TNF-alpha (top):

11 \*P<0.05 for OXY-SAP and CON-SAP (0.06 and 0.034  $\mu\text{g}/\mu\text{L}$ ) vs PBS or

12 Noninjected

13 \*P<0.05 for OXY-SAP and CON-SAP (0.016  $\mu\text{g}/\mu\text{L}$ ) vs PBS

14 \*\*0.05<P<0.1 for CON-SAP vs. Noninjected

15

16 IL-1beta (bottom):

17 \*P<0.05 for OXY-SAP (0.06  $\mu\text{g}/\mu\text{L}$ ) and CON-SAP (0.06/0 and 034  $\mu\text{g}/\mu\text{L}$ ) vs

18 PBS or Noninjected.

19 \*\*0.05<P<0.1 for OXY-SAP (0.034  $\mu\text{g}/\mu\text{L}$ ) vs PBS

20 \*P<0.05 for OXY-SAP (0.016  $\mu\text{g}/\mu\text{L}$ ) vs PBS

21

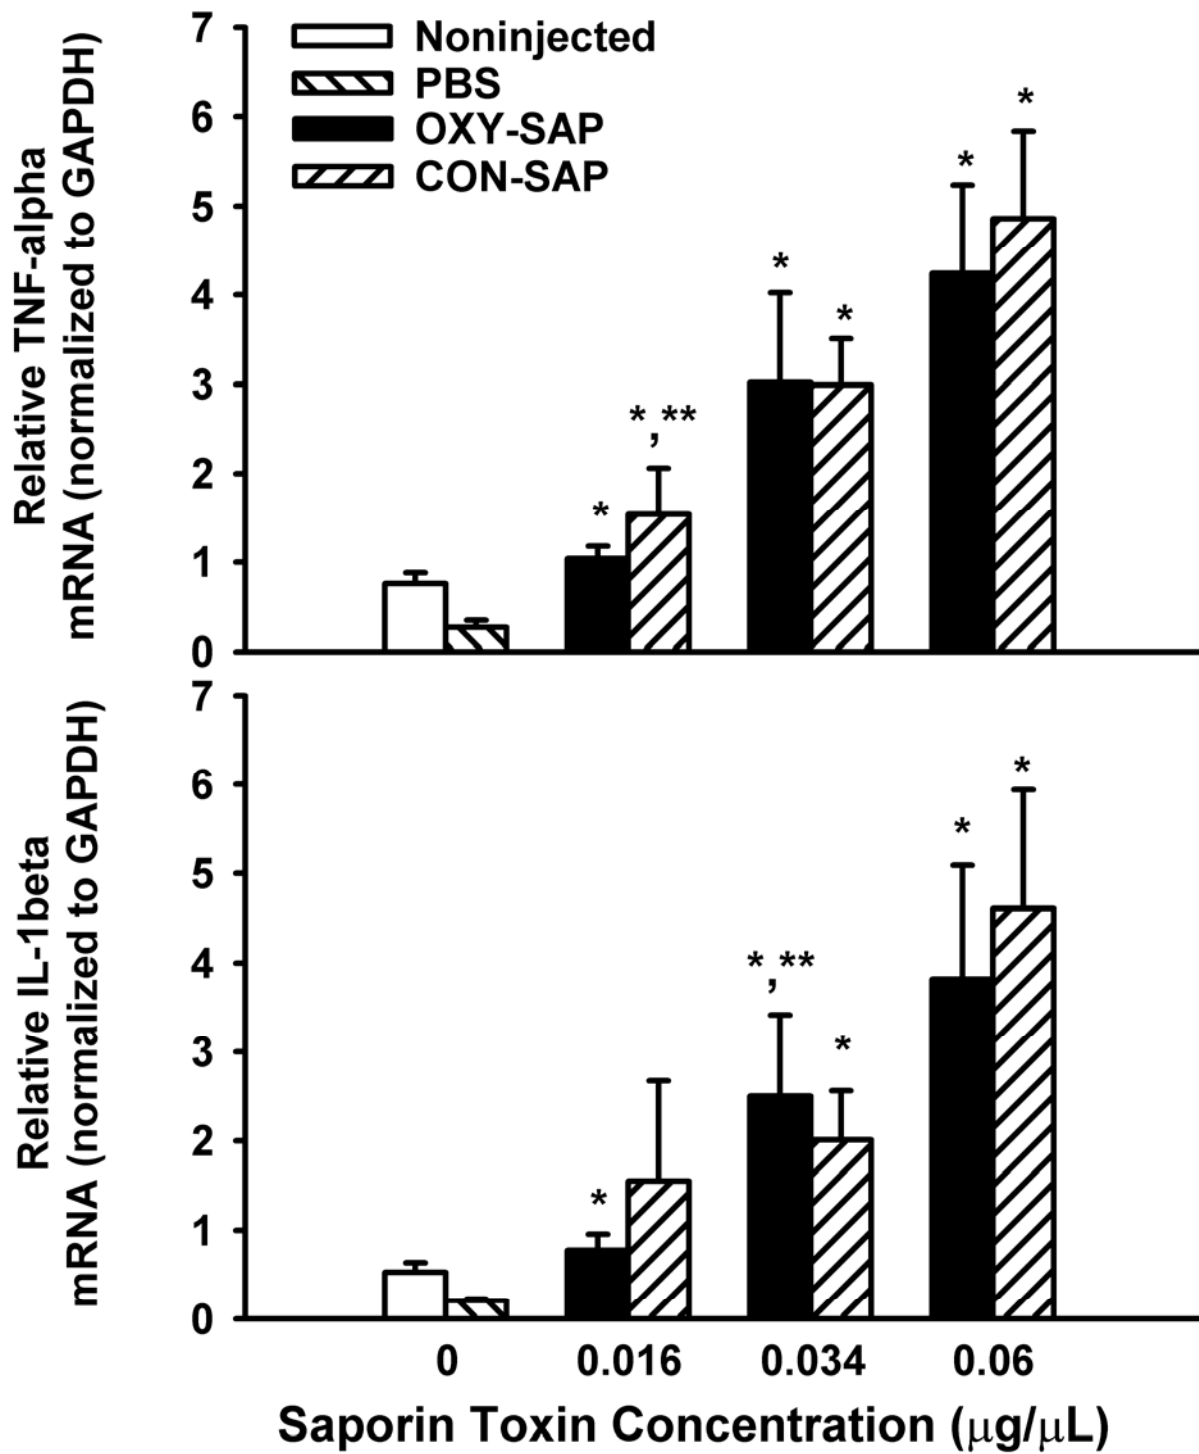

Supplement: en.2010-0295_1.pdf [file en.2010-0295_1.pdf]
